# Supplementary material
Source: HighWire-hosted journal article supplement (http://www.jneurosci.org/highwire/filestream/599602/field_highwire_adjunct_files/1/Supplemental_Legend.pdf)
Supplement: Supplemental_Legend.pdf [file Supplemental_Legend.pdf]

**Supplemental Data. Effects of Me $\beta$ CD or siRNA on GTRAP3-18 or EAAC1 expression and GSH contents in the mouse cortex and cerebellum.** (A) Adult male C57BL/6J mice were treated intracerebroventricularly for 5 days with either Me $\beta$ CD (40 mg/mL; flow rate = 0.5  $\mu$ L/h) or aCSF. GTRAP3-18 immunolabeling was performed in the mouse cortex and cerebellum, and examined by confocal laser-scanning fluorescent microscopy in two independent experiments. (B) Adult male C57BL/6J mice were treated intracerebroventricularly for 1 week with GTRAP3-18 siRNA or non-silencing siRNA (20 mg/mL; flow rate = 0.5  $\mu$ L/h). GTRAP3-18 immunolabeling was performed in the mouse cortex and cerebellum, and examined by confocal laser-scanning fluorescent microscopy in two independent experiments.
